# Supplementary material
Source: Springer Nature journal article supplement (https://www.springermedizin.de/resource/supplementary/12950_2012_272_MOESM11_ESM.pdf/9558332)

**A**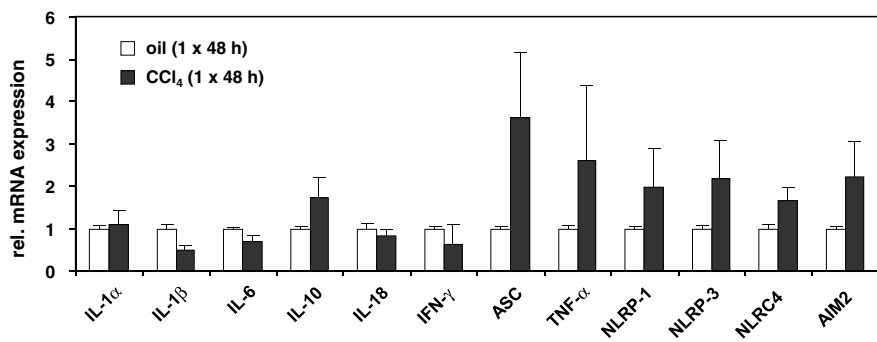**B**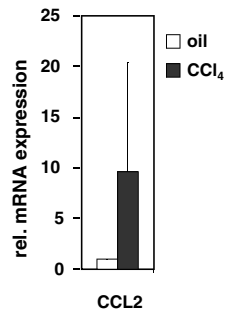**C**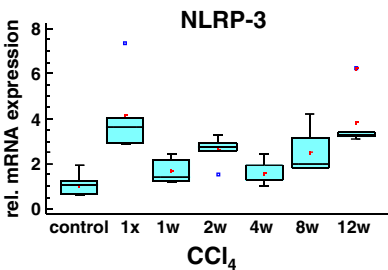**D**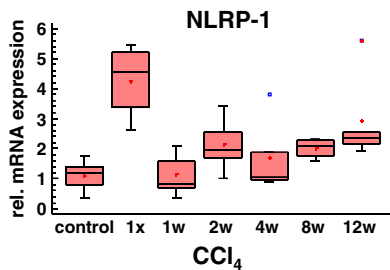**E**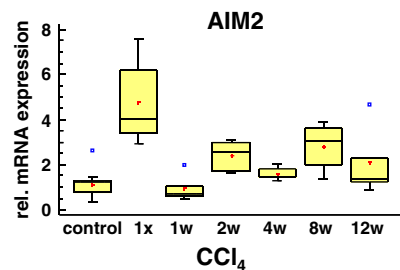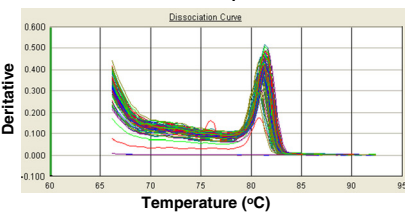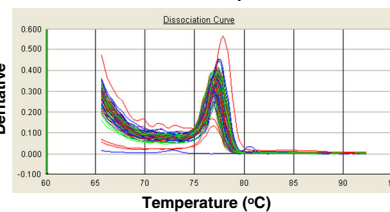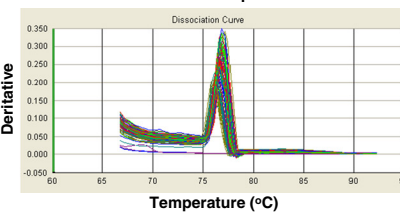

Supplement: MOESM11 [file 9558332]
